# Supplementary material for: Functional characterization of enhancer activity during a long terminal repeat's evolution
Source: Genome Res. 2022 Oct;32(10):1840–51. doi: 10.1101/gr.276863.122 (PMC9712623; doi:10.1101/gr.276863.122)
Supplement: Supplemental Material [file supp_gr.276863.122_Supplemental_Table_S1.xlsx]

## Sheet: Legend
LTR18A elements (hg19) that were retained for evolutionary reconstruction analysis

## Sheet: Retained LTR18A
Chr	Start	Stop	Repeat name	Repeat class/family	Strand	Repeat start	Repeat end	(left)	ID
chr1	64652289	64652626	LTR18A	LTR/ERVL	+	1	357	0	125454
chr1	64658106	64658445	LTR18A	LTR/ERVL	+	1	357	0	125454
chr1	66847749	66847890	LTR18A	LTR/ERVL	+	102	245	-112	129224
chr1	66849001	66849375	LTR18A	LTR/ERVL	+	1	357	0	129223
chr1	71093640	71094038	LTR18A	LTR/ERVL	+	1	340	-17	136034
chr1	71096558	71096968	LTR18A	LTR/ERVL	+	1	357	0	136035
chr1	80515902	80516259	LTR18A	LTR/ERVL	+	1	357	0	149330
chr1	80519922	80520273	LTR18A	LTR/ERVL	+	1	357	0	149332
chr1	86875032	86875345	LTR18A	LTR/ERVL	-	0	357	1	158502
chr1	86882024	86882363	LTR18A	LTR/ERVL	-	0	357	1	158502
chr1	117918872	117919214	LTR18A	LTR/ERVL	+	1	357	0	205376
chr1	168233478	168233803	LTR18A	LTR/ERVL	-	0	357	1	250003
chr1	168239841	168240170	LTR18A	LTR/ERVL	-	0	357	1	250003
chr1	184256207	184256606	LTR18A	LTR/ERVL	+	2	357	0	275016
chr1	184259387	184259752	LTR18A	LTR/ERVL	+	1	355	-2	275017
chr1	187811863	187812200	LTR18A	LTR/ERVL	-	0	357	1	280307
chr1	196504740	196505114	LTR18A	LTR/ERVL	-	0	357	1	291727
chr1	196507492	196507888	LTR18A	LTR/ERVL	-	0	357	1	291728
chr1	199636157	199636523	LTR18A	LTR/ERVL	-	-2	355	1	295868
chr2	5488484	5488840	LTR18A	LTR/ERVL	-	0	357	1	381662
chr2	36012811	36013170	LTR18A	LTR/ERVL	+	1	357	0	431021
chr2	36015502	36015868	LTR18A	LTR/ERVL	+	1	357	0	431023
chr2	61184937	61185293	LTR18A	LTR/ERVL	+	1	357	0	470299
chr2	78332876	78333181	LTR18A	LTR/ERVL	-	-39	318	1	497989
chr2	78339209	78339539	LTR18A	LTR/ERVL	-	0	357	1	497989
chr2	119762069	119762472	LTR18A	LTR/ERVL	-	0	357	1	552672
chr2	128588456	128588799	LTR18A	LTR/ERVL	+	1	357	0	566474
chr2	129212781	129213116	LTR18A	LTR/ERVL	+	1	357	0	567643
chr2	138138281	138138657	LTR18A	LTR/ERVL	+	1	357	0	580723
chr2	138141054	138141430	LTR18A	LTR/ERVL	+	1	357	0	580723
chr2	149011213	149011552	LTR18A	LTR/ERVL	-	0	357	2	595525
chr2	149017114	149017451	LTR18A	LTR/ERVL	-	-2	355	1	595525
chr2	187296112	187296451	LTR18A	LTR/ERVL	+	1	357	0	649350
chr2	187302542	187302881	LTR18A	LTR/ERVL	+	1	357	0	649351
chr2	200088508	200088822	LTR18A	LTR/ERVL	-	0	357	1	667279
chr2	200094812	200095147	LTR18A	LTR/ERVL	-	0	357	4	667279
chr3	31398316	31398683	LTR18A	LTR/ERVL	-	0	357	1	785054
chr3	46459046	46459386	LTR18A	LTR/ERVL	-	0	357	1	808857
chr3	46465061	46465391	LTR18A	LTR/ERVL	-	0	357	3	808857
chr3	83549525	83549860	LTR18A	LTR/ERVL	-	0	357	1	869065
chr3	106484195	106484547	LTR18A	LTR/ERVL	+	1	356	-1	894601
chr3	156338154	156338484	LTR18A	LTR/ERVL	+	1	357	0	970597
chr3	156344026	156344366	LTR18A	LTR/ERVL	+	1	357	0	970597
chr4	4258476	4258586	LTR18A	LTR/ERVL	-	0	357	248	1041922
chr4	4258739	4258935	LTR18A	LTR/ERVL	-	-147	210	4	1041922
chr4	24967399	24967729	LTR18A	LTR/ERVL	+	7	357	0	1076317
chr4	24972980	24973297	LTR18A	LTR/ERVL	+	1	329	-28	1076318
chr4	25360251	25360618	LTR18A	LTR/ERVL	+	3	357	0	1077060
chr4	25362977	25363358	LTR18A	LTR/ERVL	+	1	357	0	1077060
chr4	41296576	41296994	LTR18A	LTR/ERVL	+	1	357	0	1102519
chr4	44487476	44487786	LTR18A	LTR/ERVL	+	1	357	0	1107158
chr4	44489476	44489795	LTR18A	LTR/ERVL	+	1	357	0	1107159
chr4	58909705	58909804	LTR18A	LTR/ERVL	+	1	99	-258	1124485
chr4	84838878	84839219	LTR18A	LTR/ERVL	+	1	357	0	1160245
chr4	84883553	84883903	LTR18A	LTR/ERVL	-	0	357	1	1160310
chr4	84886219	84886568	LTR18A	LTR/ERVL	-	0	357	3	1160311
chr4	99586063	99586402	LTR18A	LTR/ERVL	-	0	357	1	1180733
chr4	100554995	100555343	LTR18A	LTR/ERVL	+	1	357	0	1182220
chr4	104467293	104467391	LTR18A	LTR/ERVL	-	0	357	268	1187600
chr4	104467694	104467916	LTR18A	LTR/ERVL	-	-90	267	1	1187600
chr4	104468525	104468629	LTR18A	LTR/ERVL	-	-253	104	1	1187602
chr4	104676106	104676416	LTR18A	LTR/ERVL	+	1	318	-39	1187834
chr4	117278995	117279344	LTR18A	LTR/ERVL	+	1	357	0	1205121
chr4	117283022	117283398	LTR18A	LTR/ERVL	+	1	357	0	1205121
chr4	132505702	132506070	LTR18A	LTR/ERVL	-	0	357	1	1225961
chr4	144163168	144163505	LTR18A	LTR/ERVL	+	3	357	0	1241506
chr4	179057695	179058024	LTR18A	LTR/ERVL	+	1	357	0	1290258
chr4	179063981	179064286	LTR18A	LTR/ERVL	+	1	357	0	1290258
chr5	18792357	18792722	LTR18A	LTR/ERVL	+	2	357	0	1331285
chr5	23425319	23425727	LTR18A	LTR/ERVL	+	1	357	0	1337623
chr5	59009067	59009406	LTR18A	LTR/ERVL	+	3	357	0	1383684
chr5	59011906	59012254	LTR18A	LTR/ERVL	+	1	357	0	1383684
chr5	68225831	68226223	LTR18A	LTR/ERVL	-	0	357	1	1397086
chr5	68228640	68228941	LTR18A	LTR/ERVL	-	0	357	1	1397088
chr5	101093715	101094043	LTR18A	LTR/ERVL	-	0	357	1	1444581
chr5	101098068	101098146	LTR18A	LTR/ERVL	-	0	357	292	1444581
chr5	101098453	101098713	LTR18A	LTR/ERVL	-	-66	291	1	1444581
chr5	103521877	103522228	LTR18A	LTR/ERVL	+	1	357	0	1447754
chr5	103524861	103525186	LTR18A	LTR/ERVL	+	1	357	0	1447755
chr5	106209194	106209596	LTR18A	LTR/ERVL	-	0	357	1	1451066
chr5	106212284	106212679	LTR18A	LTR/ERVL	-	0	357	1	1451067
chr5	110634824	110635162	LTR18A	LTR/ERVL	+	1	357	0	1456804
chr5	160359116	160359481	LTR18A	LTR/ERVL	-	0	357	2	1536129
chr5	160365485	160365835	LTR18A	LTR/ERVL	-	0	357	1	1536129
chr5	167484828	167485192	LTR18A	LTR/ERVL	-	0	357	1	1546736
chr6	65801566	65801895	LTR18A	LTR/ERVL	+	1	355	-2	1671606
chr6	67188590	67188956	LTR18A	LTR/ERVL	-	0	357	1	1673317
chr6	67191429	67191552	LTR18A	LTR/ERVL	-	0	357	237	1673319
chr6	67191592	67191706	LTR18A	LTR/ERVL	+	244	357	0	1673320
chr6	67606420	67606763	LTR18A	LTR/ERVL	+	1	357	0	1673811
chr6	67607576	67607935	LTR18A	LTR/ERVL	+	2	357	0	1673813
chr6	67608057	67608180	LTR18A	LTR/ERVL	+	200	338	-19	1673814
chr6	68055910	68056272	LTR18A	LTR/ERVL	+	1	357	0	1674388
chr6	68058544	68058937	LTR18A	LTR/ERVL	+	1	357	0	1674389
chr6	80017310	80017643	LTR18A	LTR/ERVL	-	-2	355	1	1690374
chr6	80022931	80023265	LTR18A	LTR/ERVL	-	0	357	3	1690374
chr6	84577402	84577715	LTR18A	LTR/ERVL	+	1	357	0	1696521
chr6	90907692	90908101	LTR18A	LTR/ERVL	+	1	357	0	1705677
chr6	98977314	98977475	LTR18A	LTR/ERVL	+	1	186	-171	1715812
chr6	98980002	98980353	LTR18A	LTR/ERVL	+	1	357	0	1715813
chr6	99467180	99467520	LTR18A	LTR/ERVL	-	0	357	1	1716504
chr6	99473987	99474326	LTR18A	LTR/ERVL	-	0	357	1	1716504
chr6	118674550	118675013	LTR18A	LTR/ERVL	-	0	357	1	1745059
chr6	124283762	124284111	LTR18A	LTR/ERVL	+	1	357	0	1752589
chr6	125588644	125588686	LTR18A	LTR/ERVL	+	1	42	-315	1754321
chr6	125589046	125589385	LTR18A	LTR/ERVL	+	1	357	0	1754322
chr6	125595258	125595597	LTR18A	LTR/ERVL	+	1	357	0	1754324
chr6	135192544	135192866	LTR18A	LTR/ERVL	-	0	357	41	1768189
chr6	135193180	135193221	LTR18A	LTR/ERVL	-	-317	40	2	1768189
chr6	135196453	135196787	LTR18A	LTR/ERVL	-	-1	356	1	1768194
chr6	153167910	153168251	LTR18A	LTR/ERVL	-	0	357	1	1795283
chr6	165595658	165595984	LTR18A	LTR/ERVL	+	1	357	0	1813165
chr7	42515955	42516367	LTR18A	LTR/ERVL	+	1	357	0	1883882
chr7	80893388	80893726	LTR18A	LTR/ERVL	-	-2	355	1	1942477
chr7	80896774	80897115	LTR18A	LTR/ERVL	-	0	357	1	1942477
chr7	81831300	81831670	LTR18A	LTR/ERVL	+	1	357	0	1943740
chr7	81834142	81834527	LTR18A	LTR/ERVL	+	1	357	0	1943741
chr7	86362976	86363353	LTR18A	LTR/ERVL	-	0	357	1	1949644
chr7	89066796	89067126	LTR18A	LTR/ERVL	+	1	357	0	1953247
chr7	103744469	103744806	LTR18A	LTR/ERVL	-	0	357	1	1977483
chr7	146200924	146201242	LTR18A	LTR/ERVL	-	0	357	2	2041151
chr7	146207137	146207469	LTR18A	LTR/ERVL	-	0	357	1	2041151
chrX	81629042	81629376	LTR18A	LTR/ERVL	-	0	357	1	2177363
chrX	127941430	127941774	LTR18A	LTR/ERVL	+	1	357	0	2238954
chr8	27894344	27894679	LTR18A	LTR/ERVL	+	1	357	0	2321897
chr8	36431254	36431642	LTR18A	LTR/ERVL	-	0	357	1	2335846
chr8	36433655	36434040	LTR18A	LTR/ERVL	-	0	357	5	2335847
chr8	96697678	96698024	LTR18A	LTR/ERVL	-	0	357	1	2417569
chr8	107072701	107073035	LTR18A	LTR/ERVL	+	1	357	0	2434789
chr8	124729973	124730339	LTR18A	LTR/ERVL	+	1	356	-1	2461919
chr9	31790806	31791170	LTR18A	LTR/ERVL	+	2	355	-2	2544243
chr9	77850473	77850824	LTR18A	LTR/ERVL	-	0	357	1	2584455
chr9	77854017	77854400	LTR18A	LTR/ERVL	-	0	357	1	2584455
chr9	96153402	96153732	LTR18A	LTR/ERVL	-	0	357	1	2612078
chr10	60375081	60375438	LTR18A	LTR/ERVL	+	1	357	0	2778107
chr10	60378006	60378405	LTR18A	LTR/ERVL	+	1	357	0	2778107
chr10	72408348	72408700	LTR18A	LTR/ERVL	+	1	357	0	2798004
chr10	72411509	72411850	LTR18A	LTR/ERVL	+	1	357	0	2798004
chr10	113240970	113241297	LTR18A	LTR/ERVL	-	0	357	3	2866742
chr11	27312792	27313133	LTR18A	LTR/ERVL	-	0	357	3	2940062
chr11	39361328	39361667	LTR18A	LTR/ERVL	-	0	357	1	2959169
chr11	48171765	48172070	LTR18A	LTR/ERVL	-	0	357	3	2974764
chr11	59936726	59937039	LTR18A	LTR/ERVL	-	0	357	1	2985141
chr11	74251414	74251805	LTR18A	LTR/ERVL	+	1	357	0	3011648
chr11	74255168	74255540	LTR18A	LTR/ERVL	+	1	357	0	3011649
chr11	85656452	85656784	LTR18A	LTR/ERVL	+	1	357	0	3032470
chr11	87070457	87070547	LTR18A	LTR/ERVL	+	1	90	-267	3034892
chr11	87070725	87070966	LTR18A	LTR/ERVL	+	95	357	0	3034892
chr11	100660095	100660483	LTR18A	LTR/ERVL	-	0	357	1	3053954
chr11	103411891	103412223	LTR18A	LTR/ERVL	-	0	357	1	3058098
chr11	104521072	104521405	LTR18A	LTR/ERVL	+	1	357	0	3059714
chr12	79153145	79153477	LTR18A	LTR/ERVL	-	-2	355	1	3224766
chr12	84749430	84749743	LTR18A	LTR/ERVL	+	25	357	0	3232530
chr12	84752913	84753011	LTR18A	LTR/ERVL	+	244	340	-17	3232531
chr13	63056506	63056816	LTR18A	LTR/ERVL	-	0	357	1	3390949
chr13	70777889	70778206	LTR18A	LTR/ERVL	+	1	357	0	3400864
chr13	72592916	72593264	LTR18A	LTR/ERVL	+	1	357	0	3403309
chr13	72598094	72598447	LTR18A	LTR/ERVL	+	1	357	0	3403310
chr13	78085759	78086094	LTR18A	LTR/ERVL	+	1	357	0	3411601
chr13	85868561	85868640	LTR18A	LTR/ERVL	-	0	357	273	3421790
chr13	91265670	91266028	LTR18A	LTR/ERVL	-	-1	356	1	3428656
chr13	91270592	91270681	LTR18A	LTR/ERVL	-	-268	89	1	3428657
chr14	30996358	30996689	LTR18A	LTR/ERVL	-	0	357	1	3478185
chr14	80602803	80603155	LTR18A	LTR/ERVL	+	1	357	0	3556685
chr14	88214309	88214647	LTR18A	LTR/ERVL	-	0	357	1	3567537
chr16	63452002	63452305	LTR18A	LTR/ERVL	-	0	357	1	3833941
chr18	22188746	22188972	LTR18A	LTR/ERVL	-	-113	244	16	4056157
chr18	44711117	44711461	LTR18A	LTR/ERVL	+	1	357	0	4088833
chr18	51468410	51468589	LTR18A	LTR/ERVL	-	-200	157	1	4099831
chr18	51470966	51471382	LTR18A	LTR/ERVL	-	0	357	7	4099832
chr18	65472596	65472934	LTR18A	LTR/ERVL	+	1	355	-2	4120761
chr20	35616830	35617160	LTR18A	LTR/ERVL	-	0	357	1	4192156
chr19	23526297	23526654	LTR18A	LTR/ERVL	+	1	357	0	4327516
chr19	23663901	23664257	LTR18A	LTR/ERVL	+	1	357	0	4327727
chr19	24024373	24024723	LTR18A	LTR/ERVL	-	0	357	1	4328230
chr19	24322840	24323196	LTR18A	LTR/ERVL	-	0	357	1	4328621
chr22	28495175	28495538	LTR18A	LTR/ERVL	+	1	357	0	4412640
chr22	34730792	34731181	LTR18A	LTR/ERVL	-	-2	355	1	4425691
chr21	16673271	16673637	LTR18A	LTR/ERVL	-	-1	356	4	4461253
chr21	29765657	29766036	LTR18A	LTR/ERVL	+	1	357	0	4479272
chr21	29768728	29769148	LTR18A	LTR/ERVL	+	1	357	0	4479273
