# Supplementary material for: Functional characterization of enhancer activity during a long terminal repeat's evolution
Source: Genome Res. 2022 Oct;32(10):1840–51. doi: 10.1101/gr.276863.122 (PMC9712623; doi:10.1101/gr.276863.122)
Supplement: Supplemental Material [file supp_gr.276863.122_Supplemental_Table_S2.xlsx]

## Sheet: Legend
LTR18A substitution rate compared to genomic background. Expected substitution rates from genome-wide comparisons between hg19 and other primate genomes are shown for the entire genome and the masked (repetitive) genome. The observed rate is the average substitution rate for LTR18A orthologs between hg19 and other primate genomes. The number of orthologous LTR18A for each species is displayed on …

## Sheet: LTR18A_divergence
	hg19	panTro4	gorGor3	nomLeu3	papAnu2	rheMac3	calJac3
Expected (genome)	0	0.0137029	0.0174025	0.0375626	0.0615581	0.0615449	0.100839
Expected (masked)	0	0.0145372	0.0185668	NA	0.0646662	0.0660691	0.107163
Observed	0	0.0154313	0.0217819	0.0497281	0.0780336	0.0788572	0.129252
Percent increase (observed over genome)	0	0.126135	0.251653	0.323872	0.267641	0.281296	0.28176
Number	181	176	173	152	144	148	76
