# Supplementary material for: Functional characterization of enhancer activity during a long terminal repeat's evolution
Source: Genome Res. 2022 Oct;32(10):1840–51. doi: 10.1101/gr.276863.122 (PMC9712623; doi:10.1101/gr.276863.122)
Supplement: Supplemental Material [file supp_gr.276863.122_Supplemental_Table_S3.xlsx]

## Sheet: Legend
LTR18A elements (hg19) that were removed from evolutionary reconstruction analysis and the reason for their removal

## Sheet: Removed LTR18A
coordinate	reason for removal
chr2:53717712-53717918	Alignment is to LTR18B
chr2:53717983-53718184	Same element ID as chr2:53717712-53717918 (above) and LTR18A alignment truncated (1-210)
chr4:28012466-28012685	Alignment is to LTR18B
chr4:28012746-28012949	Same element ID as chr4:28012466-28012685 (above) and LTR18A alignment truncated (1-211), also paired LTR with LTR18C (chr4:28016239-28016607)
chr4:90025654-90025852	Same element ID as chr4:90025918-90026134 (below) and LTR18A alignment truncated (1-211)
chr4:90025918-90026134	Alignment is to LTR18B and LTR18A, alignment to LTR18B is used in rmsk out because it is longer
chr4:90029346-90029548	Same element ID as chr4:90029626-90029704 and chr4:90029757-90029861 (both below), LTR18A alignment truncated (1-211)
chr4:90029626-90029704	Alignment is to LTR18B
chr4:90029757-90029861	Alignment is to LTR18B
chr10:59575924-59576130	Alignment is to LTR18B and LTR18A, LTR18A alignment is truncated (285-357) but alignment to LTR18B is used in rmsk out because it is longer
chr11:21832342-21832596	Alignment is to LTR18B (2 pieces) and LTR18A, LTR18A alignment is truncated (1-181) but alignment to LTR18B (combined 2 pieces) is used in rmsk out because it is longer
chr11:21832616-21832829	Alignment is to LTR18B, also paired LTR with LTR18C (chr11:21835813-21836035)
chr1:191578310-191578437	Paired LTR with LTR18B (chr1:191577527-191578089)
chr11:101626917-101627207	Alignment is to LTR18B, LTR18C, and LTR18A (which is highest scoring), LTR18A alignment is truncated (1-210) but alignment to LTR18B is used in rmsk out because it is longer
chr11:101627272-101627424	Alignment is to LTR18B and LTR18A, LTR18A alignment is truncated (245-355) but alignment to LTR18B is used in rmsk out because it is longer
chr18:22188578-22188720	Alignment is to LTR18C and LTR18A, LTR18A alignment is truncated (225-357) but start is from LTR18C alignment while stop is from LTR18A alignment
chr18:51468362-51468410	Alignment is to LTR18C
