# Supplementary material for: Functional characterization of enhancer activity during a long terminal repeat's evolution
Source: Genome Res. 2022 Oct;32(10):1840–51. doi: 10.1101/gr.276863.122 (PMC9712623; doi:10.1101/gr.276863.122)
Supplement: Supplemental Material [file supp_gr.276863.122_Supplemental_Table_S4.xlsx]

## Sheet: Legend
Motifs enriched in active LTR18A over inactive LTR18A (motif-focused library)

## Sheet: HepG2
rank	motif_ID	consensus	p-value	adj_p-value	E-value	tests	FASTA_max	pos	neg	PWM_min	TP	%TP	FP	%FP
1	HLF_HUMAN.H11MO.0.C	GRTTRYGTAAYMS	5.28e-168	6e-165	2.41e-162	1136	1004	1004	502	2.81	961	95.72	150	29.88
2	DBP_HUMAN.H11MO.0.B	VTTATGYAABM	2.83e-156	3.44e-153	1.38e-150	1214	1004	1004	502	10.9	909	90.54	117	23.31
3	CEBPA_HUMAN.H11MO.0.A	DRTTGTGCAAYV	4.12e-111	4.04e-108	1.63e-105	981	1004	1004	502	1.13	848	84.46	132	26.29
4	CEBPG_HUMAN.H11MO.0.B	RTTGCATCAKHH	6.6e-101	5.78e-98	2.32e-95	875	1004	1004	502	1.28	760	75.7	96	19.12
5	CEBPE_HUMAN.H11MO.0.A	TTKCGHAATMTB	3.14e-81	3.32e-78	1.33e-75	1057	1004	1004	502	1.16	851	84.76	180	35.86
6	BATF3_HUMAN.H11MO.0.B	BRSTTTCADTWTGASWM	1.15e-36	6.41e-34	2.58e-31	558	1004	1004	502	2.03	393	39.14	48	9.56
7	FOSB_HUMAN.H11MO.0.A	RTGAGTCAB	1.07e-29	1.5e-26	6.04e-24	1404	1004	1004	502	30.6	675	67.23	184	36.65
8	JUND_HUMAN.H11MO.0.A	RRTGAGTCAYY	2.45e-29	2.89e-26	1.16e-23	1176	1004	1004	502	21.9	675	67.23	185	36.85
9	JUN_HUMAN.H11MO.0.A	DRTGAGTCAYH	1.71e-28	1.86e-25	7.49e-23	1088	1004	1004	502	5.43	706	70.32	204	40.64
10	FOSL2_HUMAN.H11MO.0.A	NDRTGAGTCAYH	6.4e-28	6.4e-25	2.57e-22	1001	1004	1004	502	19.9	675	67.23	189	37.65
11	FOSL1_HUMAN.H11MO.0.A	KRVTGAGTCAYH	6.93e-28	6.92e-25	2.78e-22	998	1004	1004	502	11.4	688	68.53	196	39.04
12	FOS_HUMAN.H11MO.0.A	VTGAGTCAB	1.63e-27	2.25e-24	9.04e-22	1384	1004	1004	502	30.5	686	68.33	196	39.04
13	JUNB_HUMAN.H11MO.0.A	DVTGAGTCABH	1.05e-26	1.28e-23	5.14e-21	1217	1004	1004	502	34	674	67.13	192	38.25
14	FOXA3_HUMAN.H11MO.0.B	CHTGTTTACWTWG	3.04e-22	1.37e-19	5.49e-17	449	1004	1004	502	1.7	345	34.36	60	11.95
15	USF1_HUMAN.H11MO.0.A	RGTCACGTGRBS	9.73e-22	4.06e-19	1.63e-16	417	1004	1004	502	5.5	190	18.92	14	2.79
16	MITF_HUMAN.H11MO.0.A	TCACGTGACC	2.74e-21	1.42e-18	5.71e-16	518	1004	1004	502	4.72	215	21.41	21	4.18
17	NF2L1_HUMAN.H11MO.0.C	HGTCATN	1.29e-19	1.62e-16	6.5e-14	1251	1004	1004	502	2.76	715	71.22	237	47.21
18	CLOCK_HUMAN.H11MO.0.C	CWGHCACGTGMVVM	2.8e-19	3.06e-16	1.23e-13	1090	1004	1004	502	2.91	399	39.74	88	17.53
19	BMAL1_HUMAN.H11MO.0.A	KSCACGTGHSY	1.57e-18	1.14e-15	4.57e-13	723	1004	1004	502	7.01	381	37.95	83	16.53
20	BHE40_HUMAN.H11MO.0.A	DGCACGTGAS	4.68e-18	2.27e-15	9.11e-13	484	1004	1004	502	3.46	233	23.21	32	6.37
21	MYCN_HUMAN.H11MO.0.A	RGCCACGTGSDS	5.65e-17	3.52e-14	1.42e-11	624	1004	1004	502	1.62	349	34.76	75	14.94
22	USF2_HUMAN.H11MO.0.A	GGGTCACGTGRBSVSSSSB	2.7e-16	8.17e-14	3.28e-11	303	1004	1004	502	3.07	191	19.02	23	4.58
23	MYC_HUMAN.H11MO.0.A	RCCACGTGCTB	3.09e-16	1.83e-13	7.36e-11	593	1004	1004	502	2.18	333	33.17	71	14.14
24	MAX_HUMAN.H11MO.0.A	VRGCACGTGG	3e-14	1.66e-11	6.67e-09	553	1004	1004	502	2.16	252	25.1	47	9.36
25	NF2L2_HUMAN.H11MO.0.A	WWYTGCTGAGTCAT	5.76e-14	6.57e-11	2.64e-08	1140	1004	1004	502	2.23	800	79.68	308	61.35
26	SRBP2_HUMAN.H11MO.0.B	VSGTGGGGWGABG	2.1e-13	1.69e-10	6.79e-08	805	1004	1004	502	1.24	547	54.48	174	34.66
27	TFE3_HUMAN.H11MO.0.B	RGTCACGTGA	6.85e-13	2.66e-10	1.07e-07	388	1004	1004	502	1.55	250	24.9	50	9.96
28	MAFG_HUMAN.H11MO.0.A	RWWWNTGCTGASTCAGCA	8.47e-13	4.35e-10	1.75e-07	514	1004	1004	502	2	380	37.85	101	20.12
29	ATF6A_HUMAN.H11MO.0.B	GKGSTGACGTGG	2.73e-12	5.19e-10	2.09e-07	190	1004	1004	502	3.86	128	12.75	13	2.59
30	ATF3_HUMAN.H11MO.0.A	GGTSACGTGAB	1.76e-12	7.32e-10	2.94e-07	416	1004	1004	502	1.34	290	28.88	66	13.15
31	BACH2_HUMAN.H11MO.0.A	TGCTGAGTCAB	1.03e-12	1.32e-09	5.32e-07	1284	1004	1004	502	2.11	860	85.66	351	69.92
32	THB_HUMAN.H11MO.0.C	GRSSYSASVTSAGGTCA	4.43e-12	1.48e-09	5.94e-07	333	1004	1004	502	3.09	212	21.12	39	7.77
33	BACH1_HUMAN.H11MO.0.A	TGCTGAGTCABSS	4.52e-12	5.89e-09	2.37e-06	1301	1004	1004	502	410	364	36.25	97	19.32
34	PO3F2_HUMAN.H11MO.0.A	YYCATGCATWTYCATTM	1.81e-11	1.05e-08	4.24e-06	584	1004	1004	502	16.7	213	21.22	41	8.17
35	GCR_HUMAN.H11MO.0.A	RGAACABMVTGTNCY	3.27e-11	2.37e-08	9.53e-06	725	1004	1004	502	8.56	175	17.43	29	5.78
36	CEBPB_HUMAN.H11MO.0.A	DRTTRYGCAATM	2.67e-09	7.39e-07	0.000297	277	1004	1004	502	1.09	225	22.41	52	10.36
37	MZF1_HUMAN.H11MO.0.B	RRDRGGGAWTKRR	1.79e-09	1.18e-06	0.000476	660	1004	1004	502	1.09	493	49.1	166	33.07
38	MAFK_HUMAN.H11MO.0.A	RAWWHTGCTGASTCAGCA	1.6e-09	1.19e-06	0.000478	745	1004	1004	502	17.1	420	41.83	132	26.29
39	MXI1_HUMAN.H11MO.0.A	VCACGTGGSNGSBGS	7.87e-09	3.53e-06	0.00142	448	1004	1004	502	4.02	128	12.75	20	3.98
40	ETS1_HUMAN.H11MO.0.A	RRRCMGGAAGTGG	2.47e-08	4.8e-06	0.00193	194	1004	1004	502	4.77	82	8.17	8	1.59
41	MEF2A_HUMAN.H11MO.0.A	DKCTATTTTTRGM	2.38e-08	6.86e-06	0.00276	288	1004	1004	502	1.61	224	22.31	55	10.96
42	RARG_HUMAN.H11MO.0.B	RGGTCASVRTGVCMTGRV	1.1e-08	1.12e-05	0.00452	1021	1004	1004	502	1.22	723	72.01	288	57.37
43	BATF_HUMAN.H11MO.0.A	RBTYTCRDWATGASTCAB	4.72e-08	1.37e-05	0.00552	291	1004	1004	502	7.88	72	7.17	6	1.2
44	AHR_HUMAN.H11MO.0.B	DTYGCGTGM	8.45e-08	2.29e-05	0.0092	271	1004	1004	502	2.91	123	12.25	21	4.18
45	NFE2_HUMAN.H11MO.0.A	VVRTGACTCAGCA	3.28e-08	3.95e-05	0.0159	1206	1004	1004	502	273	419	41.73	138	27.49
46	TAF1_HUMAN.H11MO.0.A	RARRWGGCGGMGGMGR	5.31e-08	4e-05	0.0161	754	1004	1004	502	1.16	547	54.48	200	39.84
47	LHX2_HUMAN.H11MO.0.A	KBYTAATTRGYK	2.66e-07	4.88e-05	0.0196	183	1004	1004	502	1.3	137	13.65	27	5.38
48	PRGR_HUMAN.H11MO.0.A	RGAACATTYTGTTCTB	1.04e-07	5.09e-05	0.0204	487	1004	1004	502	1.69	297	29.58	87	17.33
49	CUX1_HUMAN.H11MO.0.C	RBRSBDATCGATSK	2.11e-07	5.77e-05	0.0232	274	1004	1004	502	1.11	212	21.12	54	10.76
50	TFEB_HUMAN.H11MO.0.C	RGTCACGTG	1.96e-06	7.25e-05	0.0292	37	1004	1004	502	23.9	32	3.19	0	0
51	MEF2C_HUMAN.H11MO.0.A	DKCTATTTTTRGM	3.09e-07	9.07e-05	0.0364	293	1004	1004	502	1.44	218	21.71	57	11.35
52	KLF15_HUMAN.H11MO.0.A	RGGGMGGRGVDGGGGGRGG	4.93e-07	9.91e-05	0.0398	201	1004	1004	502	1.48	163	16.24	37	7.37

## Sheet: K562
rank	motif_ID	consensus	p-value	adj_p-value	E-value	tests	FASTA_max	pos	neg	PWM_min	TP	%TP	FP	%FP
1	NRF1_HUMAN.H11MO.0.A	CWSTGCGCATGCGCRDS	1.42e-30	2.96e-28	1.19e-25	209	52	52	1454	14.4	31	59.62	42	2.89
2	JUND_HUMAN.H11MO.0.A	RRTGAGTCAYY	2.49e-14	2.92e-11	1.17e-08	1172	52	52	1454	38.3	47	90.38	561	38.58
3	JUN_HUMAN.H11MO.0.A	DRTGAGTCAYH	2.7e-12	2.93e-09	1.18e-06	1085	52	52	1454	33.1	44	84.62	529	36.38
4	BACH1_HUMAN.H11MO.0.A	TGCTGAGTCABSS	5.52e-12	7.15e-09	2.88e-06	1297	52	52	1454	253	40	76.92	428	29.44
5	ATF6A_HUMAN.H11MO.0.B	GKGSTGACGTGG	6.35e-11	1.16e-08	4.65e-06	182	52	52	1454	1.21	25	48.08	157	10.8
6	FOSL2_HUMAN.H11MO.0.A	NDRTGAGTCAYH	1.76e-11	1.8e-08	7.25e-06	1023	52	52	1454	35.3	44	84.62	556	38.24
7	NF2L2_HUMAN.H11MO.0.A	WWYTGCTGAGTCAT	2.88e-11	3.26e-08	1.31e-05	1135	52	52	1454	230	43	82.69	533	36.66
8	NFE2_HUMAN.H11MO.0.A	VVRTGACTCAGCA	8.65e-11	1.04e-07	4.18e-05	1203	52	52	1454	362	40	76.92	465	31.98
9	FOSB_HUMAN.H11MO.0.A	RTGAGTCAB	3.38e-10	4.79e-07	0.000192	1416	52	52	1454	37.1	48	92.31	744	51.17
10	MYCN_HUMAN.H11MO.0.A	RGCCACGTGSDS	1.51e-09	7.7e-07	0.00031	509	52	52	1454	7.64	24	46.15	168	11.55
11	AP2B_HUMAN.H11MO.0.B	GCCYGVGGGS	2.29e-09	1e-06	0.000402	437	52	52	1454	1.34	26	50	205	14.1
12	BACH2_HUMAN.H11MO.0.A	TGCTGAGTCAB	8.75e-10	1.13e-06	0.000452	1287	52	52	1454	107	43	82.69	586	40.3
13	FEV_HUMAN.H11MO.0.B	GCVGGAAGYG	2.84e-09	1.51e-06	0.000606	531	52	52	1454	1.76	34	65.38	367	25.24
14	FOSL1_HUMAN.H11MO.0.A	KRVTGAGTCAYH	2.01e-09	2.01e-06	0.00081	1002	52	52	1454	45.8	48	92.31	776	53.37
15	FOS_HUMAN.H11MO.0.A	VTGAGTCAB	4.05e-09	5.59e-06	0.00225	1380	52	52	1454	36.5	48	92.31	789	54.26
16	BHE40_HUMAN.H11MO.0.A	DGCACGTGAS	1.32e-08	6.09e-06	0.00245	461	52	52	1454	2.99	28	53.85	261	17.95
17	SRBP2_HUMAN.H11MO.0.B	VSGTGGGGWGABG	8.39e-09	6.16e-06	0.00248	734	52	52	1454	3.45	24	46.15	184	12.65
18	KLF12_HUMAN.H11MO.0.C	VGGGGCGGGGC	6.18e-06	6.8e-05	0.0273	11	52	52	1454	5.34	4	7.69	1	0.07
19	JUNB_HUMAN.H11MO.0.A	DVTGAGTCABH	7.5e-08	9.16e-05	0.0368	1222	52	52	1454	36.8	47	90.38	806	55.43
20	ZN335_HUMAN.H11MO.0.A	RGCTGYCYNBVSCKMTGCCTGW	1.11e-07	0.000109	0.0438	985	52	52	1454	67.7	29	55.77	309	21.25
154	USF1_HUMAN.H11MO.0.A	RGTCACGTGRBS	2.16e-08	7.24e-06	0.00291	336	52	52	1454	2.6	28	53.85	267	18.36
155	USF2_HUMAN.H11MO.0.A	GGGTCACGTGRBSVSSSSB	2.97e-08	8.87e-06	0.00357	299	52	52	1454	1.27	28	53.85	271	18.64
302	MAFK_HUMAN.H11MO.0.A	RAWWHTGCTGASTCAGCA	3.35e-09	2.49e-06	0.001	743	52	52	1454	8.2	42	80.77	578	39.75
303	MAX_HUMAN.H11MO.0.A	VRGCACGTGG	2.41e-08	1.2e-05	0.00483	499	52	52	1454	4.88	21	40.38	146	10.04
304	MAFG_HUMAN.H11MO.0.A	RWWWNTGCTGASTCAGCA	5.83e-08	2.95e-05	0.0119	507	52	52	1454	1.9	36	69.23	461	31.71
367	GFI1B_HUMAN.H11MO.0.A	GCWSWGATTT	1.68e-07	8.61e-05	0.0346	511	52	52	1454	8.29	25	48.08	235	16.16
