# Supplementary material for: Functional characterization of enhancer activity during a long terminal repeat's evolution
Source: Genome Res. 2022 Oct;32(10):1840–51. doi: 10.1101/gr.276863.122 (PMC9712623; doi:10.1101/gr.276863.122)
Supplement: Supplemental Material [file supp_gr.276863.122_Supplemental_Table_S5.xlsx]

## Sheet: Legend
Motifs enriched in SHARPR peaks in HepG2 over shuffled

## Sheet: SHARPR enriched motifs
rank	motif_ID	consensus	p-value	adj_p-value	E-value	tests	FASTA_max	pos	neg	PWM_min	TP	%TP	FP	%FP
1	DBP_HUMAN.H11MO.0.B	VTTATGYAABM	7.18e-78	2.36e-75	9.49e-73	329	336	336	1008	16.9	128	38.1	6	0.6
2	HLF_HUMAN.H11MO.0.C	GRTTRYGTAAYMS	1.2e-75	2.33e-73	9.37e-71	194	336	336	1008	13.9	125	37.2	6	0.6
3	JUND_HUMAN.H11MO.0.A	RRTGAGTCAYY	4.14e-57	1.31e-54	5.26e-52	316	336	336	1008	1.78	171	50.89	88	8.73
4	NF2L2_HUMAN.H11MO.0.A	WWYTGCTGAGTCAT	4.57e-56	7.22e-54	2.9e-51	158	336	336	1008	2.04	120	35.71	24	2.38
5	NFAC2_HUMAN.H11MO.0.B	TGGAAAAWY	1.99e-55	4.33e-53	1.74e-50	217	336	336	1008	7.98	118	35.12	23	2.28
6	FOSL1_HUMAN.H11MO.0.A	KRVTGAGTCAYH	1.34e-54	2.31e-52	9.27e-50	172	336	336	1008	19.3	109	32.44	16	1.59
7	FOSB_HUMAN.H11MO.0.A	RTGAGTCAB	3.9e-54	1.48e-51	5.94e-49	379	336	336	1008	13.1	115	34.23	22	2.18
8	NFIA_HUMAN.H11MO.0.C	TTGGCHNRNWGCCAR	6.56e-54	2.71e-51	1.09e-48	413	336	336	1008	31.3	96	28.57	7	0.69
9	FOS_HUMAN.H11MO.0.A	VTGAGTCAB	1.22e-53	4.65e-51	1.87e-48	381	336	336	1008	12.5	111	33.04	19	1.88
10	BACH1_HUMAN.H11MO.0.A	TGCTGAGTCABSS	4.37e-53	1.25e-50	5.03e-48	286	336	336	1008	66.8	88	26.19	3	0.3
11	JUN_HUMAN.H11MO.0.A	DRTGAGTCAYH	1.34e-52	3.66e-50	1.47e-47	272	336	336	1008	12.4	106	31.55	16	1.59
12	FOSL2_HUMAN.H11MO.0.A	NDRTGAGTCAYH	2.56e-52	4.56e-50	1.83e-47	178	336	336	1008	10.3	109	32.44	19	1.88
13	NFE2_HUMAN.H11MO.0.A	VVRTGACTCAGCA	1.43e-51	3.2e-49	1.29e-46	224	336	336	1008	24.4	91	27.08	6	0.6
14	JUNB_HUMAN.H11MO.0.A	DVTGAGTCABH	7.85e-51	2.38e-48	9.56e-46	303	336	336	1008	15.3	111	33.04	23	2.28
15	BACH2_HUMAN.H11MO.0.A	TGCTGAGTCAB	7.59e-50	2.31e-47	9.28e-45	304	336	336	1008	28.4	90	26.79	7	0.69
16	BATF3_HUMAN.H11MO.0.B	BRSTTTCADTWTGASWM	4.22e-45	1e-42	4.04e-40	238	336	336	1008	1.19	150	44.64	86	8.53
17	ZN384_HUMAN.H11MO.0.C	GSAAAAAVYMKS	5.29e-44	8.42e-42	3.38e-39	159	336	336	1008	10	88	26.19	12	1.19
18	NFAC3_HUMAN.H11MO.0.B	TGGAAAAHY	5.29e-44	1.08e-41	4.34e-39	204	336	336	1008	18.4	88	26.19	12	1.19
19	MAFK_HUMAN.H11MO.0.A	RAWWHTGCTGASTCAGCA	5.77e-43	6.87e-41	2.76e-38	119	336	336	1008	5.79	90	26.79	15	1.49
20	PAX6_HUMAN.H11MO.0.C	TYMYGCTTSABT	9.91e-43	3.61e-40	1.45e-37	364	336	336	1008	1.1	188	55.95	165	16.37
21	PRDM6_HUMAN.H11MO.0.C	RRRARGAAAAAAA	8e-41	1.62e-38	6.49e-36	202	336	336	1008	6.19	99	29.46	27	2.68
22	ZN335_HUMAN.H11MO.0.A	RGCTGYCYNBVSCKMTGCCTGW	1.75e-40	3.28e-38	1.32e-35	187	336	336	1008	1.76	122	36.31	56	5.56
23	NFIC_HUMAN.H11MO.0.A	CYTGGCHBYMWGCCARG	2.62e-40	8.81e-38	3.54e-35	336	336	336	1008	9.62	100	29.76	29	2.88
24	CLOCK_HUMAN.H11MO.0.C	CWGHCACGTGMVVM	1.93e-40	1.12e-37	4.51e-35	580	336	336	1008	5.37	116	34.52	48	4.76
25	ZFP42_HUMAN.H11MO.0.A	GGCMGCCATTTT	1.01e-39	2.22e-37	8.92e-35	220	336	336	1008	1.11	138	41.07	82	8.13
26	ZN418_HUMAN.H11MO.0.C	TGCTTYTRGCYTCTKVY	2.87e-39	6.69e-37	2.69e-34	233	336	336	1008	2	122	36.31	59	5.85
27	NFAC4_HUMAN.H11MO.0.C	WGGAAAAYTW	6.93e-39	1.52e-36	6.1e-34	219	336	336	1008	4.95	111	33.04	45	4.46
28	CEBPE_HUMAN.H11MO.0.A	TTKCGHAATMTB	1.64e-32	4.09e-30	1.65e-27	249	336	336	1008	1.07	140	41.67	109	10.81
29	BMAL1_HUMAN.H11MO.0.A	KSCACGTGHSY	1.65e-32	5.73e-30	2.3e-27	348	336	336	1008	4.43	111	33.04	61	6.05
30	Z354A_HUMAN.H11MO.0.C	RTTTARWYCATTTACATTTAATGT	3.71e-30	3.08e-28	1.24e-25	83	336	336	1008	3.38	68	20.24	14	1.39
31	CEBPG_HUMAN.H11MO.0.B	RTTGCATCAKHH	3.64e-30	6.77e-28	2.72e-25	186	336	336	1008	1.19	113	33.63	71	7.04
32	MITF_HUMAN.H11MO.0.A	TCACGTGACC	1.43e-29	2.94e-27	1.18e-24	206	336	336	1008	2.15	104	30.95	59	5.85
33	NRF1_HUMAN.H11MO.0.A	CWSTGCGCATGCGCRDS	4.85e-29	3.88e-27	1.56e-24	80	336	336	1008	1.4	65	19.35	13	1.29
34	TBP_HUMAN.H11MO.0.A	MTATAAAARS	7.57e-29	1.53e-26	6.15e-24	202	336	336	1008	2.14	89	26.49	40	3.97
35	MAFG_HUMAN.H11MO.0.A	RWWWNTGCTGASTCAGCA	9.09e-28	7.46e-26	3e-23	82	336	336	1008	1.65	65	19.35	15	1.49
36	USF1_HUMAN.H11MO.0.A	RGTCACGTGRBS	9.84e-26	1.48e-23	5.93e-21	150	336	336	1008	1.13	93	27.68	54	5.36
37	BHE40_HUMAN.H11MO.0.A	DGCACGTGAS	4.53e-25	1.31e-22	5.26e-20	289	336	336	1008	1.05	143	42.56	146	14.48
38	MAFB_HUMAN.H11MO.0.B	TGCTGASTYAD	3.5e-24	1.86e-21	7.49e-19	532	336	336	1008	7.26	80	23.81	40	3.97
39	ZSC31_HUMAN.H11MO.0.C	RGCAGCAGGGCARTTAKR	1.55e-23	3e-21	1.21e-18	194	336	336	1008	20.2	51	15.18	9	0.89
40	MYCN_HUMAN.H11MO.0.A	RGCCACGTGSDS	1.42e-23	3.92e-21	1.57e-18	276	336	336	1008	2.03	103	30.65	77	7.64
41	ATF6A_HUMAN.H11MO.0.B	GKGSTGACGTGG	1.16e-22	8.46e-21	3.4e-18	73	336	336	1008	1.15	57	16.96	16	1.59
42	MAFF_HUMAN.H11MO.0.B	TGCTGASTCAGCABTTTT	3.64e-22	9.28e-20	3.73e-17	255	336	336	1008	1.92	109	32.44	93	9.23
43	NKX31_HUMAN.H11MO.0.C	NTWAAGTGBTTD	2.5e-22	1.08e-19	4.33e-17	430	336	336	1008	2.76	118	35.12	109	10.81
44	ZN320_HUMAN.H11MO.0.C	GKGGGDCCMGGGGGCCWRTG	9.99e-21	1.14e-18	4.58e-16	114	336	336	1008	1.69	73	21.73	40	3.97
45	TFDP1_HUMAN.H11MO.0.C	RRRRGGCGGGAARN	6.72e-21	1.47e-18	5.91e-16	219	336	336	1008	2.28	88	26.19	62	6.15
46	AP2B_HUMAN.H11MO.0.B	GCCYGVGGGS	8.49e-21	2.22e-18	8.9e-16	261	336	336	1008	1.09	125	37.2	130	12.9
47	NF2L1_HUMAN.H11MO.0.C	HGTCATN	5.47e-20	2.25e-17	9.05e-15	411	336	336	1008	1.78	122	36.31	128	12.7
48	KLF15_HUMAN.H11MO.0.A	RGGGMGGRGVDGGGGGRGG	1.5e-19	2.62e-17	1.06e-14	175	336	336	1008	1.65	91	27.08	72	7.14
49	MAF_HUMAN.H11MO.0.A	VAAWBTGCTGASTHWGCMD	2.93e-19	8.28e-17	3.33e-14	282	336	336	1008	2.02	108	32.14	104	10.32
50	PKNX1_HUMAN.H11MO.0.B	TGABTGRCAGS	5.08e-19	1.4e-16	5.64e-14	276	336	336	1008	6.06	68	20.24	38	3.77
51	PBX3_HUMAN.H11MO.0.A	TGABTGRCRGS	2.06e-18	6.19e-16	2.49e-13	301	336	336	1008	5.23	66	19.64	37	3.67
52	E2F3_HUMAN.H11MO.0.A	DDGGCGGGAAA	2.16e-18	6.9e-16	2.77e-13	319	336	336	1008	4.05	78	23.21	55	5.46
53	USF2_HUMAN.H11MO.0.A	GGGTCACGTGRBSVSSSSB	1.96e-17	2.37e-15	9.53e-13	121	336	336	1008	1.23	72	21.43	49	4.86
54	NKX21_HUMAN.H11MO.0.A	BTKGAGTGSY	2.87e-17	1.16e-14	4.68e-12	406	336	336	1008	8.19	67	19.94	42	4.17
55	MXI1_HUMAN.H11MO.0.A	VCACGTGGSNGSBGS	4.33e-17	1.4e-14	5.64e-12	324	336	336	1008	1.96	102	30.36	103	10.22
56	EGR1_HUMAN.H11MO.0.A	VDRDGCGKGGGYGGRRR	7.9e-17	2.38e-14	9.55e-12	301	336	336	1008	1.15	131	38.99	165	16.37
57	TFE3_HUMAN.H11MO.0.B	RGTCACGTGA	2.21e-16	3.6e-14	1.45e-11	163	336	336	1008	1.16	84	25	73	7.24
58	EGR2_HUMAN.H11MO.0.A	GRGRRKGWGKGGGHGGRG	1.46e-16	4.51e-14	1.81e-11	309	336	336	1008	1.46	128	38.1	160	15.87
59	DLX3_HUMAN.H11MO.0.C	GMTAATTRSW	6.7e-16	6.9e-14	2.77e-11	103	336	336	1008	3.21	51	15.18	24	2.38
60	MYC_HUMAN.H11MO.0.A	RCCACGTGCTB	4.14e-16	1.17e-13	4.71e-11	283	336	336	1008	1.13	124	36.9	154	15.28
61	MZF1_HUMAN.H11MO.0.B	RRDRGGGAWTKRR	8.44e-16	2.52e-13	1.01e-10	299	336	336	1008	2.65	95	28.27	96	9.52
62	FOXP1_HUMAN.H11MO.0.A	TBTGTTTMY	1.3e-15	4.23e-13	1.7e-10	326	336	336	1008	1.11	135	40.18	182	18.06
63	E2F1_HUMAN.H11MO.0.A	RRNKGGCGGGAARR	4.61e-15	7.52e-13	3.02e-10	163	336	336	1008	1.09	84	25	79	7.84
64	VEZF1_HUMAN.H11MO.0.C	GGRRRRGRRGGAGGGGGRGRRR	4.84e-15	1.39e-12	5.58e-10	287	336	336	1008	2.69	105	31.25	120	11.9
65	P63_HUMAN.H11MO.0.A	DRCAWGYCCAGRCWTGYYB	3.38e-14	5.21e-12	2.09e-09	154	336	336	1008	1.29	79	23.51	74	7.34
66	NFKB1_HUMAN.H11MO.0.A	AGGGAAAK	5.47e-14	1.8e-11	7.23e-09	329	336	336	1008	1.64	116	34.52	150	14.88
67	NOBOX_HUMAN.H11MO.0.C	HTAATTRSY	2.58e-13	4.08e-11	1.64e-08	158	336	336	1008	2.89	54	16.07	36	3.57
68	MAX_HUMAN.H11MO.0.A	VRGCACGTGG	1.27e-13	4.34e-11	1.74e-08	341	336	336	1008	3.03	86	25.6	90	8.93
69	ZN331_HUMAN.H11MO.0.C	GGCTGGGCTCAGCTGGGTGG	1.67e-12	5.69e-11	2.29e-08	34	336	336	1008	2.64	28	8.33	6	0.6
70	NFAC1_HUMAN.H11MO.0.B	AWGGAAARWVWGAMW	2.37e-13	6.2e-11	2.49e-08	262	336	336	1008	1.34	103	30.65	126	12.5
71	ZNF85_HUMAN.H11MO.0.C	AWAGAARWCTGMWGKAATCT	1.97e-12	1.34e-10	5.37e-08	68	336	336	1008	5.08	32	9.52	10	0.99
72	PRRX2_HUMAN.H11MO.0.C	YTAATTR	3.19e-12	3.96e-10	1.59e-07	124	336	336	1008	2.63	54	16.07	40	3.97
73	ATF3_HUMAN.H11MO.0.A	GGTSACGTGAB	3.31e-12	7.04e-10	2.83e-07	213	336	336	1008	1.21	89	26.49	104	10.32
74	P73_HUMAN.H11MO.0.A	RRRCAWGYCCARRCWTGYC	6.2e-12	1.47e-09	5.93e-07	238	336	336	1008	6.15	60	17.86	51	5.06
75	ETS2_HUMAN.H11MO.0.B	RDVRGGAARVRRR	7.1e-12	2.65e-09	1.06e-06	373	336	336	1008	1.05	143	42.56	230	22.82
76	CEBPA_HUMAN.H11MO.0.A	DRTTGTGCAAYV	1.58e-11	3.46e-09	1.39e-06	219	336	336	1008	1.07	96	28.57	123	12.2
77	MYB_HUMAN.H11MO.0.A	RVWGRCAGTTRR	9.12e-12	3.56e-09	1.43e-06	390	336	336	1008	4.12	74	22.02	77	7.64
78	FOXO4_HUMAN.H11MO.0.C	TTGTTTAYK	3.4e-11	6.23e-09	2.5e-06	183	336	336	1008	1.06	83	24.7	98	9.72
79	HXB13_HUMAN.H11MO.0.A	TTTTATDGSH	9.28e-11	1.34e-08	5.37e-06	144	336	336	1008	1.09	69	20.54	73	7.24
80	ZIC3_HUMAN.H11MO.0.B	GGCYHCCTGCTGWGH	1.38e-10	2.8e-08	1.13e-05	203	336	336	1008	13	38	11.31	22	2.18
81	TYY1_HUMAN.H11MO.0.A	CAARATGGCGGC	7.63e-10	4.66e-08	1.87e-05	61	336	336	1008	1.18	37	11.01	23	2.28
82	KLF5_HUMAN.H11MO.0.A	WGGGTGKGGCDGGG	3.04e-10	8.62e-08	3.47e-05	284	336	336	1008	1.12	113	33.63	171	16.96
83	BCL6_HUMAN.H11MO.0.A	YKCTTTCYAGGAA	9.1e-10	1.62e-07	6.51e-05	178	336	336	1008	1.13	79	23.51	99	9.82
84	NKX32_HUMAN.H11MO.0.C	TTAAGTGBWT	2.44e-09	4.09e-07	0.000164	168	336	336	1008	5.45	43	12.8	34	3.37
85	KLF6_HUMAN.H11MO.0.A	GSRRGGGHGGGGMHGGGRV	1.46e-09	4.09e-07	0.000165	280	336	336	1008	2.45	84	25	111	11.01
86	SRBP2_HUMAN.H11MO.0.B	VSGTGGGGWGABG	1.67e-09	7.92e-07	0.000318	474	336	336	1008	1.15	155	46.13	284	28.17
87	CUX1_HUMAN.H11MO.0.C	RBRSBDATCGATSK	8.47e-09	1.08e-06	0.000432	127	336	336	1008	1.06	60	17.86	67	6.65
88	ATF4_HUMAN.H11MO.0.A	RRMTGATGCAAY	1.79e-08	1.16e-06	0.000467	65	336	336	1008	1.12	37	11.01	28	2.78
89	PEBB_HUMAN.H11MO.0.C	TYTGTGGTYWB	4.6e-09	1.47e-06	0.000592	320	336	336	1008	1.11	119	35.42	196	19.44
90	PRDM1_HUMAN.H11MO.0.A	RAAAGTGAAAGTGR	1.4e-08	1.91e-06	0.000769	137	336	336	1008	2.08	53	15.77	55	5.46
91	E2F6_HUMAN.H11MO.0.A	DGGGCGGGARRVR	1.47e-08	3.12e-06	0.00126	213	336	336	1008	1.16	86	25.6	123	12.2
92	BATF_HUMAN.H11MO.0.A	RBTYTCRDWATGASTCAB	2.4e-08	3.13e-06	0.00126	130	336	336	1008	1.36	56	16.67	62	6.15
93	ZN708_HUMAN.H11MO.0.C	GCCTAATAARBAGGYACAGC	8.1e-08	6.8e-06	0.00273	84	336	336	1008	4.25	28	8.33	17	1.69
94	PBX1_HUMAN.H11MO.0.A	TGABTGACAG	1.99e-08	6.87e-06	0.00276	346	336	336	1008	6.14	43	12.8	38	3.77
95	RARG_HUMAN.H11MO.0.B	RGGTCASVRTGVCMTGRV	4.66e-08	1.49e-05	0.00597	319	336	336	1008	1.43	106	31.55	174	17.26
96	SP4_HUMAN.H11MO.0.A	SRGVARGRGGCGGRGCHDRR	7.95e-08	1.53e-05	0.00617	193	336	336	1008	1.32	77	22.92	109	10.81
97	ZN554_HUMAN.H11MO.0.C	GCWGAGYCANGTRGDKKRCT	3.36e-07	7.16e-05	0.0288	213	336	336	1008	1.33	80	23.81	121	12
98	THB_HUMAN.H11MO.0.C	GRSSYSASVTSAGGTCA	4.38e-07	7.49e-05	0.0301	171	336	336	1008	1.54	66	19.64	91	9.03
99	REL_HUMAN.H11MO.0.B	DRWRGGGRAATKCCA	5.92e-07	9.11e-05	0.0366	154	336	336	1008	1.57	56	16.67	71	7.04
100	GCR_HUMAN.H11MO.0.A	RGAACABMVTGTNCY	1.27e-06	0.000278	0.112	219	336	336	1008	1.25	79	23.51	124	12.3
101	NR1H4_HUMAN.H11MO.0.B	RRGGKCAVTGRCCBSGVGG	1.94e-06	0.000309	0.124	159	336	336	1008	1.5	58	17.26	79	7.84
102	P53_HUMAN.H11MO.0.A	DGRCATGYCCAGRCATGYCY	5.68e-06	0.000454	0.183	80	336	336	1008	1.75	38	11.31	42	4.17
103	KLF1_HUMAN.H11MO.0.A	DGGGYGKGGCYGGG	3.22e-06	0.000521	0.209	162	336	336	1008	1.13	65	19.35	96	9.52
104	MAZ_HUMAN.H11MO.0.A	GGGGGAGGGGGDGRGRRRGRRG	3.23e-06	0.000701	0.282	217	336	336	1008	1.49	82	24.4	135	13.39
105	NKX28_HUMAN.H11MO.0.C	TTCAAGKRC	3.78e-06	0.000722	0.29	191	336	336	1008	1.04	74	22.02	117	11.61
106	NKX25_HUMAN.H11MO.0.B	KKRAGWGS	1.25e-06	0.000758	0.305	609	336	336	1008	1.03	189	56.25	416	41.27
107	NR1D1_HUMAN.H11MO.0.B	RRRNMASTGGGTCAGDRDR	2.81e-06	0.00116	0.466	413	336	336	1008	64.6	12	3.57	2	0.2
108	SNAI2_HUMAN.H11MO.0.A	RRCAGGTGCN	8.93e-06	0.00118	0.473	132	336	336	1008	9.34	45	13.39	57	5.65
109	PO3F2_HUMAN.H11MO.0.A	YYCATGCATWTYCATTM	9.81e-06	0.00121	0.485	123	336	336	1008	31.9	14	4.17	5	0.5
110	E2F7_HUMAN.H11MO.0.B	GDGGCGGGAARDR	5.95e-06	0.00134	0.54	226	336	336	1008	1.44	71	21.13	112	11.11
111	COT1_HUMAN.H11MO.0.C	GRGGKSARAGGTCAGGG	7.17e-06	0.00203	0.818	284	336	336	1008	1.56	90	26.79	158	15.67
112	ESR2_HUMAN.H11MO.0.A	RGGTCASCSTGMCCY	1.14e-05	0.00225	0.904	198	336	336	1008	1.59	61	18.15	92	9.13
113	MEF2A_HUMAN.H11MO.0.A	DKCTATTTTTRGM	4.59e-05	0.00275	1.11	60	336	336	1008	1.31	27	8.04	27	2.68
114	NR2C2_HUMAN.H11MO.0.B	GSTYMVRGGTCA	1.7e-05	0.00302	1.22	178	336	336	1008	3.14	44	13.1	57	5.65
115	ZFX_HUMAN.H11MO.0.A	SCAGGCCBCR	1.87e-05	0.00308	1.24	165	336	336	1008	1.18	61	18.15	94	9.33
116	FOXM1_HUMAN.H11MO.0.A	TGTTTRCTYWKB	1.51e-05	0.00454	1.83	302	336	336	1008	1.07	104	30.95	197	19.54
117	ZBT17_HUMAN.H11MO.0.A	SRRGGWGGGGGAGGGGMRR	1.74e-05	0.00487	1.96	281	336	336	1008	1.33	97	28.87	180	17.86
118	ZN547_HUMAN.H11MO.0.C	TGCTAATKCWGCARGCABRC	6.42e-05	0.00704	2.83	110	336	336	1008	2.9	37	11.01	47	4.66
119	STF1_HUMAN.H11MO.0.B	SYYCAAGGYCA	3.01e-05	0.00732	2.94	244	336	336	1008	1.09	85	25.3	153	15.18
120	AHR_HUMAN.H11MO.0.B	DTYGCGTGM	6.13e-05	0.0122	4.9	200	336	336	1008	1.09	72	21.43	125	12.4
121	SOX10_HUMAN.H11MO.0.B	MAARRRVDBCWTTGTT	0.000101	0.017	6.84	170	336	336	1008	1.63	53	15.77	83	8.23
122	ZN768_HUMAN.H11MO.0.C	GAGGCHCAGAGAGGTTAAGT	0.00063	0.0193	7.78	31	336	336	1008	5.6	13	3.87	9	0.89
