# Supplementary material for: Functional characterization of enhancer activity during a long terminal repeat's evolution
Source: Genome Res. 2022 Oct;32(10):1840–51. doi: 10.1101/gr.276863.122 (PMC9712623; doi:10.1101/gr.276863.122)
Supplement: Supplemental Material [file supp_gr.276863.122_Supplemental_Table_S6.xlsx]

## Sheet: Legend
LTR18A ATAC peaks and MPRA normalized expression in HepG2. ATAC peak overlap is indicated by "1" and lack of overlap is indicated by "0." MPRA normalized expression is the TE RNA/DNA ratio normalized to the Basal promoter RNA/DNA ratio.

## Sheet: HepG2 ATAC peak and MPRA
chrom	start	stop	subfamily	family	strand	MPRA normalized expression	ATAC peak
chr1	64652289	64652626	LTR18A	LTR/ERVL	+	3.46685	0
chr1	64658106	64658445	LTR18A	LTR/ERVL	+	6.08123	0
chr1	66847749	66847890	LTR18A	LTR/ERVL	+	NA	0
chr1	66849001	66849375	LTR18A	LTR/ERVL	+	2.64913	0
chr1	71093640	71094038	LTR18A	LTR/ERVL	+	8.47204	0
chr1	71096558	71096968	LTR18A	LTR/ERVL	+	6.98585	0
chr1	80515902	80516259	LTR18A	LTR/ERVL	+	2.35241	0
chr1	80519922	80520273	LTR18A	LTR/ERVL	+	1.41078	0
chr1	86875032	86875345	LTR18A	LTR/ERVL	-	4.95998	0
chr1	86882024	86882363	LTR18A	LTR/ERVL	-	2.71611	0
chr1	117918872	117919214	LTR18A	LTR/ERVL	+	4.80101	0
chr1	168233478	168233803	LTR18A	LTR/ERVL	-	1.40856	0
chr1	168239841	168240170	LTR18A	LTR/ERVL	-	1.55739	0
chr1	184256207	184256606	LTR18A	LTR/ERVL	+	6.61605	0
chr1	184259387	184259752	LTR18A	LTR/ERVL	+	4.21173	0
chr1	187811863	187812200	LTR18A	LTR/ERVL	-	4.86672	0
chr1	191578310	191578437	LTR18A	LTR/ERVL	+	NA	0
chr1	196504740	196505114	LTR18A	LTR/ERVL	-	0.891934	0
chr1	196507492	196507888	LTR18A	LTR/ERVL	-	3.76732	0
chr1	199636157	199636523	LTR18A	LTR/ERVL	-	2.27989	0
chr2	5488484	5488840	LTR18A	LTR/ERVL	-	3.51373	0
chr2	36012811	36013170	LTR18A	LTR/ERVL	+	1.71637	0
chr2	36015502	36015868	LTR18A	LTR/ERVL	+	2.57829	0
chr2	53717712	53717918	LTR18A	LTR/ERVL	-	NA	0
chr2	53717983	53718184	LTR18A	LTR/ERVL	-	4.16214	0
chr2	61184937	61185293	LTR18A	LTR/ERVL	+	3.40665	0
chr2	78332876	78333181	LTR18A	LTR/ERVL	-	1.72027	0
chr2	78339209	78339539	LTR18A	LTR/ERVL	-	3.68869	0
chr2	119762069	119762472	LTR18A	LTR/ERVL	-	11.1078	0
chr2	128588456	128588799	LTR18A	LTR/ERVL	+	5.56469	0
chr2	129212781	129213116	LTR18A	LTR/ERVL	+	2.90405	0
chr2	138138281	138138657	LTR18A	LTR/ERVL	+	3.54981	0
chr2	138141054	138141430	LTR18A	LTR/ERVL	+	6.60382	0
chr2	149011213	149011552	LTR18A	LTR/ERVL	-	4.74041	0
chr2	149017114	149017451	LTR18A	LTR/ERVL	-	2.80187	0
chr2	187296112	187296451	LTR18A	LTR/ERVL	+	2.52611	0
chr2	187302542	187302881	LTR18A	LTR/ERVL	+	3.44765	0
chr2	200088508	200088822	LTR18A	LTR/ERVL	-	5.95262	0
chr2	200094812	200095147	LTR18A	LTR/ERVL	-	3.02102	0
chr3	31398316	31398683	LTR18A	LTR/ERVL	-	4.11313	0
chr3	46459046	46459386	LTR18A	LTR/ERVL	-	0.855728	0
chr3	46465061	46465391	LTR18A	LTR/ERVL	-	3.49149	0
chr3	83549525	83549860	LTR18A	LTR/ERVL	-	4.55617	1
chr3	106484195	106484547	LTR18A	LTR/ERVL	+	6.79959	0
chr3	156338154	156338484	LTR18A	LTR/ERVL	+	1.78039	1
chr3	156344026	156344366	LTR18A	LTR/ERVL	+	5.36773	0
chr4	4258476	4258586	LTR18A	LTR/ERVL	-	NA	0
chr4	4258739	4258935	LTR18A	LTR/ERVL	-	3.15934	0
chr4	24967399	24967729	LTR18A	LTR/ERVL	+	5.2573	0
chr4	24972980	24973297	LTR18A	LTR/ERVL	+	0.99841	0
chr4	25360251	25360618	LTR18A	LTR/ERVL	+	2.0101	0
chr4	25362977	25363358	LTR18A	LTR/ERVL	+	3.59912	0
chr4	28012466	28012685	LTR18A	LTR/ERVL	-	NA	0
chr4	28012746	28012949	LTR18A	LTR/ERVL	-	2.08397	0
chr4	41296576	41296994	LTR18A	LTR/ERVL	+	2.32524	0
chr4	44487476	44487786	LTR18A	LTR/ERVL	+	2.95237	0
chr4	44489476	44489795	LTR18A	LTR/ERVL	+	22.127	0
chr4	58909705	58909804	LTR18A	LTR/ERVL	+	0.94992	0
chr4	84838878	84839219	LTR18A	LTR/ERVL	+	16.3359	0
chr4	84883553	84883903	LTR18A	LTR/ERVL	-	3.21901	0
chr4	84886219	84886568	LTR18A	LTR/ERVL	-	3.6308	0
chr4	90025654	90025852	LTR18A	LTR/ERVL	+	3.34534	0
chr4	90025918	90026134	LTR18A	LTR/ERVL	+	NA	0
chr4	90029346	90029548	LTR18A	LTR/ERVL	+	8.93211	0
chr4	90029626	90029704	LTR18A	LTR/ERVL	+	0.816728	0
chr4	90029757	90029861	LTR18A	LTR/ERVL	+	NA	0
chr4	99586063	99586402	LTR18A	LTR/ERVL	-	3.99876	0
chr4	100554995	100555343	LTR18A	LTR/ERVL	+	1.4189	0
chr4	104467293	104467391	LTR18A	LTR/ERVL	-	NA	0
chr4	104467694	104467916	LTR18A	LTR/ERVL	-	1.78435	0
chr4	104468525	104468629	LTR18A	LTR/ERVL	-	0.898318	0
chr4	104676106	104676416	LTR18A	LTR/ERVL	+	2.63004	0
chr4	117278995	117279344	LTR18A	LTR/ERVL	+	6.97763	0
chr4	117283022	117283398	LTR18A	LTR/ERVL	+	3.45961	0
chr4	132505702	132506070	LTR18A	LTR/ERVL	-	4.80305	0
chr4	144163168	144163505	LTR18A	LTR/ERVL	+	2.12896	0
chr4	179057695	179058024	LTR18A	LTR/ERVL	+	1.23328	0
chr4	179063981	179064286	LTR18A	LTR/ERVL	+	2.55179	0
chr5	18792357	18792722	LTR18A	LTR/ERVL	+	1.00089	0
chr5	23425319	23425727	LTR18A	LTR/ERVL	+	1.74584	0
chr5	59009067	59009406	LTR18A	LTR/ERVL	+	2.58879	0
chr5	59011906	59012254	LTR18A	LTR/ERVL	+	3.30226	0
chr5	68225831	68226223	LTR18A	LTR/ERVL	-	3.45986	0
chr5	68228640	68228941	LTR18A	LTR/ERVL	-	1.98802	0
chr5	101093715	101094043	LTR18A	LTR/ERVL	-	3.61268	0
chr5	101098068	101098146	LTR18A	LTR/ERVL	-	NA	0
chr5	101098453	101098713	LTR18A	LTR/ERVL	-	1.6705	0
chr5	103521877	103522228	LTR18A	LTR/ERVL	+	2.06567	0
chr5	103524861	103525186	LTR18A	LTR/ERVL	+	2.84594	0
chr5	106209194	106209596	LTR18A	LTR/ERVL	-	13.1886	0
chr5	106212284	106212679	LTR18A	LTR/ERVL	-	5.36624	1
chr5	110634824	110635162	LTR18A	LTR/ERVL	+	5.53431	0
chr5	160359116	160359481	LTR18A	LTR/ERVL	-	2.09325	0
chr5	160365485	160365835	LTR18A	LTR/ERVL	-	4.15766	0
chr5	167484828	167485192	LTR18A	LTR/ERVL	-	2.03968	0
chr6	65801566	65801895	LTR18A	LTR/ERVL	+	0.776794	0
chr6	67188590	67188956	LTR18A	LTR/ERVL	-	5.11724	0
chr6	67191429	67191552	LTR18A	LTR/ERVL	-	NA	0
chr6	67191592	67191706	LTR18A	LTR/ERVL	+	NA	0
chr6	67606420	67606763	LTR18A	LTR/ERVL	+	8.59441	0
chr6	67607576	67607935	LTR18A	LTR/ERVL	+	8.83405	0
chr6	67608057	67608180	LTR18A	LTR/ERVL	+	NA	0
chr6	68055910	68056272	LTR18A	LTR/ERVL	+	1.96807	0
chr6	68058544	68058937	LTR18A	LTR/ERVL	+	0.803512	0
chr6	80017310	80017643	LTR18A	LTR/ERVL	-	4.44195	0
chr6	80022931	80023265	LTR18A	LTR/ERVL	-	5.19478	0
chr6	84577402	84577715	LTR18A	LTR/ERVL	+	3.56921	0
chr6	90907692	90908101	LTR18A	LTR/ERVL	+	4.14616	0
chr6	98977314	98977475	LTR18A	LTR/ERVL	+	0.864303	0
chr6	98980002	98980353	LTR18A	LTR/ERVL	+	3.24038	0
chr6	99467180	99467520	LTR18A	LTR/ERVL	-	3.2741	0
chr6	99473987	99474326	LTR18A	LTR/ERVL	-	3.24456	0
chr6	118674550	118675013	LTR18A	LTR/ERVL	-	0.972914	0
chr6	124283762	124284111	LTR18A	LTR/ERVL	+	4.61699	0
chr6	125588644	125588686	LTR18A	LTR/ERVL	+	NA	0
chr6	125589046	125589385	LTR18A	LTR/ERVL	+	4.45714	0
chr6	125595258	125595597	LTR18A	LTR/ERVL	+	12.4038	0
chr6	135192544	135192866	LTR18A	LTR/ERVL	-	2.58182	0
chr6	135193180	135193221	LTR18A	LTR/ERVL	-	NA	0
chr6	135196453	135196787	LTR18A	LTR/ERVL	-	4.56479	0
chr6	153167910	153168251	LTR18A	LTR/ERVL	-	8.63008	0
chr6	165595658	165595984	LTR18A	LTR/ERVL	+	4.51735	0
chr7	42515955	42516367	LTR18A	LTR/ERVL	+	1.92046	0
chr7	80893388	80893726	LTR18A	LTR/ERVL	-	3.26524	0
chr7	80896774	80897115	LTR18A	LTR/ERVL	-	6.93696	0
chr7	81831300	81831670	LTR18A	LTR/ERVL	+	2.02375	0
chr7	81834142	81834527	LTR18A	LTR/ERVL	+	3.63407	0
chr7	86362976	86363353	LTR18A	LTR/ERVL	-	3.03684	0
chr7	89066796	89067126	LTR18A	LTR/ERVL	+	1.71897	0
chr7	103744469	103744806	LTR18A	LTR/ERVL	-	3.32467	0
chr7	146200924	146201242	LTR18A	LTR/ERVL	-	1.12288	0
chr7	146207137	146207469	LTR18A	LTR/ERVL	-	1.97409	0
chrX	81629042	81629376	LTR18A	LTR/ERVL	-	2.13335	0
chrX	127941430	127941774	LTR18A	LTR/ERVL	+	2.89344	0
chr8	27894344	27894679	LTR18A	LTR/ERVL	+	4.04463	0
chr8	36431254	36431642	LTR18A	LTR/ERVL	-	4.32494	0
chr8	36433655	36434040	LTR18A	LTR/ERVL	-	3.27911	0
chr8	96697678	96698024	LTR18A	LTR/ERVL	-	0.972882	0
chr8	107072701	107073035	LTR18A	LTR/ERVL	+	5.73706	0
chr8	124729973	124730339	LTR18A	LTR/ERVL	+	4.02198	0
chr9	31790806	31791170	LTR18A	LTR/ERVL	+	2.76453	0
chr9	77850473	77850824	LTR18A	LTR/ERVL	-	3.50253	0
chr9	77854017	77854400	LTR18A	LTR/ERVL	-	13.606	1
chr9	96153402	96153732	LTR18A	LTR/ERVL	-	1.79527	0
chr10	59575924	59576130	LTR18A	LTR/ERVL	-	NA	0
chr10	60375081	60375438	LTR18A	LTR/ERVL	+	2.46752	0
chr10	60378006	60378405	LTR18A	LTR/ERVL	+	5.63884	0
chr10	72408348	72408700	LTR18A	LTR/ERVL	+	3.06234	0
chr10	72411509	72411850	LTR18A	LTR/ERVL	+	7.05864	0
chr10	113240970	113241297	LTR18A	LTR/ERVL	-	4.68226	0
chr11	21832342	21832596	LTR18A	LTR/ERVL	+	15.9217	0
chr11	21832616	21832829	LTR18A	LTR/ERVL	+	NA	0
chr11	27312792	27313133	LTR18A	LTR/ERVL	-	0.980107	0
chr11	39361328	39361667	LTR18A	LTR/ERVL	-	1.32863	0
chr11	48171765	48172070	LTR18A	LTR/ERVL	-	1.77592	0
chr11	59936726	59937039	LTR18A	LTR/ERVL	-	6.96794	0
chr11	74251414	74251805	LTR18A	LTR/ERVL	+	0.80596	0
chr11	74255168	74255540	LTR18A	LTR/ERVL	+	3.26029	0
chr11	85656452	85656784	LTR18A	LTR/ERVL	+	0.795301	0
chr11	87070457	87070547	LTR18A	LTR/ERVL	+	1.13232	0
chr11	87070725	87070966	LTR18A	LTR/ERVL	+	NA	0
chr11	100660095	100660483	LTR18A	LTR/ERVL	-	2.70597	0
chr11	101626917	101627207	LTR18A	LTR/ERVL	+	2.92432	0
chr11	101627272	101627424	LTR18A	LTR/ERVL	+	NA	0
chr11	103411891	103412223	LTR18A	LTR/ERVL	-	1.27229	0
chr11	104521072	104521405	LTR18A	LTR/ERVL	+	1.33057	0
chr12	79153145	79153477	LTR18A	LTR/ERVL	-	1.01012	0
chr12	84749430	84749743	LTR18A	LTR/ERVL	+	3.79544	0
chr12	84752913	84753011	LTR18A	LTR/ERVL	+	NA	0
chr13	63056506	63056816	LTR18A	LTR/ERVL	-	2.73473	0
chr13	70777889	70778206	LTR18A	LTR/ERVL	+	1.34698	0
chr13	72592916	72593264	LTR18A	LTR/ERVL	+	0.871706	0
chr13	72598094	72598447	LTR18A	LTR/ERVL	+	1.097	0
chr13	78085759	78086094	LTR18A	LTR/ERVL	+	3.02211	0
chr13	85868561	85868640	LTR18A	LTR/ERVL	-	NA	0
chr13	91265670	91266028	LTR18A	LTR/ERVL	-	0.962746	0
chr13	91270592	91270681	LTR18A	LTR/ERVL	-	1.1143	0
chr14	30996358	30996689	LTR18A	LTR/ERVL	-	2.55734	0
chr14	80602803	80603155	LTR18A	LTR/ERVL	+	3.24126	0
chr14	88214309	88214647	LTR18A	LTR/ERVL	-	0.701924	0
chr16	63452002	63452305	LTR18A	LTR/ERVL	-	3.98586	0
chr18	22188578	22188720	LTR18A	LTR/ERVL	-	NA	0
chr18	22188746	22188972	LTR18A	LTR/ERVL	-	2.61043	0
chr18	44711117	44711461	LTR18A	LTR/ERVL	+	1.57423	0
chr18	51468362	51468410	LTR18A	LTR/ERVL	-	NA	0
chr18	51468410	51468589	LTR18A	LTR/ERVL	-	9.85649	0
chr18	51470966	51471382	LTR18A	LTR/ERVL	-	6.88032	0
chr18	65472596	65472934	LTR18A	LTR/ERVL	+	0.698809	0
chr20	35616830	35617160	LTR18A	LTR/ERVL	-	1.31573	0
chr19	23526297	23526654	LTR18A	LTR/ERVL	+	2.55928	0
chr19	23663901	23664257	LTR18A	LTR/ERVL	+	1.47963	0
chr19	24024373	24024723	LTR18A	LTR/ERVL	-	2.0195	0
chr19	24322840	24323196	LTR18A	LTR/ERVL	-	4.67918	1
chr22	28495175	28495538	LTR18A	LTR/ERVL	+	1.08504	0
chr22	34730792	34731181	LTR18A	LTR/ERVL	-	NA	0
chr21	16673271	16673637	LTR18A	LTR/ERVL	-	1.22792	0
chr21	29765657	29766036	LTR18A	LTR/ERVL	+	5.52982	0
chr21	29768728	29769148	LTR18A	LTR/ERVL	+	1.441	0
